# Supplementary material for: Co-Immobilization of Rhizopus oryzae and Candida rugosa Lipases onto mMWCNTs@4-arm-PEG-NH2—A Novel Magnetic Nanotube–Polyethylene Glycol Amine Composite—And Its Applications for Biodiesel Production
Source: MDPI journal article supplement (doi:10.3390/ijms222111956), 2021-11-04
Supplement: s1 [file s1]

## Supporting Information

### **Co-immobilization of *Rhizopus oryzae* and *Candida rugosa* lipases onto mMWCNTs@4-arm-PEG-NH<sub>2</sub>, a novel magnetic nanotube-polyethylene glycol amine composite, and its application for biodiesel production**

Saadiah A. Abdulmalek<sup>1,2</sup>, Kai Li<sup>1</sup>, Jianhua Wang<sup>1</sup>, Michael Kidane Ghide<sup>1,3</sup>, Yunjun Yan<sup>1,\*</sup>

<sup>1</sup> Key Laboratory of Molecular Biophysics of the Ministry of Education, College of Life Science and Technology, Huazhong University of Science and Technology, Wuhan, 430074, China.

<sup>2</sup> Department of Biology, Faculty of Science, Sana'a University, Sana'a, Yemen.

<sup>3</sup> Department of Biology, Mainefhi College of Science, Eritrea Institute of Technology, Mainefhi, Eritrea.

\*Corresponding author. Tel/Fax: +86-27-87792213;

E-mail: yanyunjun@hust.edu.cn

## **Results and discussion**

### **Chemical characterization of the WCO**

According to the qualitative and quantitative analysis of waste cooking oil by GC-MS, it can be seen from Table S1. the main six peaks were identified as myristic acid (C14:0, 1.05 %), palmitic acid (C16:0, 19.84 %), palmitoleic acid (C16:1, 1.25 %), stearic acid (C18:0, 6.56 %), oleic acid (C18:1, 32.24 %), linoleic acid (C18:2, 32.64 %), and linolenic acid (C18:3, 4.62 %). Thin layer chromatography analysis was also conducted (Figure S1). The standard samples from lane 1 to lane 4 were diacylglycerols (1, 2-and 1, 3-DAG), triacylglycerol (TAG), oleic acid (FFA), Soybean oil, respectively. Lane 5 was WCO. Therefore, the main component of WCO was free fatty acids, triglyceride, and a small amount of diglyceride and monoglyceride (Figure S1).

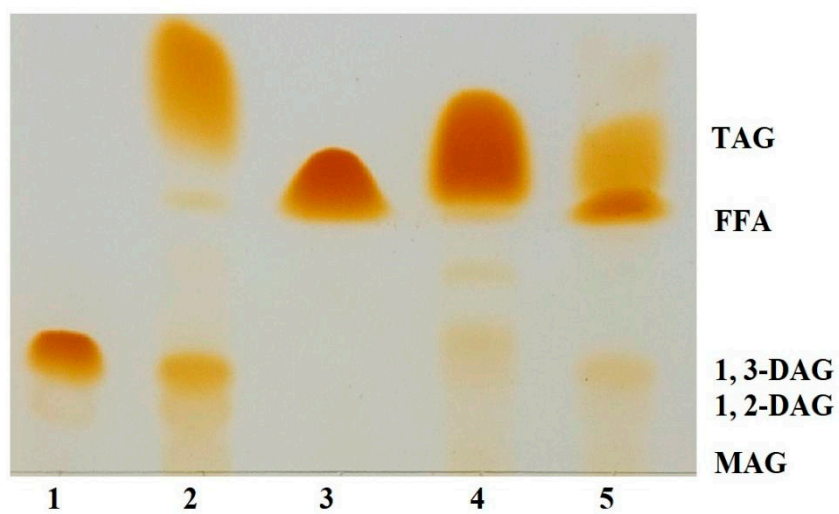

**Figure S1.** TLC analysis of waste cooking oil compositions.

**Table S1.** Analysis of fatty acid content (%) in waste cooking oil using GC-MS.

| Fatty acid       | Structure | Content (%) | Fatty acid     | Structure | Content (%) |
|------------------|-----------|-------------|----------------|-----------|-------------|
| Myristic acid    | C14:0     | 1.05        | Oleic acid     | C18:1     | 32.24       |
| Palmitic acid    | C16:0     | 19.84       | Linoleic acid  | C18:2     | 32.64       |
| Palmitoleic acid | C16:1     | 1.25        | Linolenic acid | C18:3     | 4.62        |
| Margaric acid    | C17:0     | 0.38        | Arachidic acid | C20:0     | 0.36        |
| Stearic acid     | C18:0     | 6.56        | Paullinic acid | C20:1     | 1.07        |
